# Supplementary material for: Template-assisted alloying of atom-precise silver nanoclusters: a new approach to generate cluster functionality
Source: Royal Society of Chemistry journal article supplement (doi:10.1039/d2sc04390d), 2022-01-01
Supplement: d2sc04390d1.pdf [file d2sc04390d1.pdf]

## Supporting Information

# Template-assisted alloying of atom-precise silver nanoclusters: a new approach to generate cluster functionality

*Sourav Biswas,* <sup>[a]</sup> ‡ *Anish Kumar Das,* <sup>[a]</sup> ‡ *Surya Sekhar Manna,* <sup>[b]</sup> *Biswarup Pathak,* <sup>[b]</sup>  
*Sukhendu Mandal* <sup>[a]</sup> \*

<sup>a</sup>School of Chemistry, Indian Institute of Science Education and Research  
Thiruvananthapuram, Kerala 695551, India. Email: [sukhendu@iisertvm.ac.in](mailto:sukhendu@iisertvm.ac.in)

<sup>b</sup> Department of Chemistry, Indian Institute of Technology Indore, Madhya Pradesh 453552,  
India.

‡ Both SB and AKD contributed equally.

## Table of contents

| Name               | Description                                                                         | Page No. |
|--------------------|-------------------------------------------------------------------------------------|----------|
|                    | Experimental                                                                        | S3-S5    |
| Tables S1, S2, S3  | Crystal data and structure refinement parameters                                    | S6-S8    |
| Table S4           | Luminescence parameters                                                             | S9       |
| Table S5           | Electrical conductivity and associated parameters                                   | S9       |
| Fig. S1            | Doughnut-like Ag <sub>20</sub> core                                                 | S10      |
| Fig. S2            | Reduced Density Gradient (RDG) isosurface of argentophilic interaction of three NCs | S11      |
| Fig. S3            | Three planes of Ag <sub>20</sub> skeleton                                           | S12      |
| Fig. S4            | Connection among the three planes                                                   | S13      |
| Fig. S5            | ESI-MS of the intermediate                                                          | S14      |
| Fig. S6, S7, S8    | ESI-MS fragments of <b>NC 1</b> , <b>NC 2</b> , <b>NC 3</b>                         | S15-S17  |
| Fig. S9            | XPS survey spectra of three NCs                                                     | S18      |
| Fig. S10, S11, S12 | Deconvoluted XPS spectra of the <b>NC 1</b> , <b>NC 2</b> , <b>NC 3</b>             | S19-21   |
| Fig. S13           | Cyclic-voltammetry plot of <b>NC 3</b>                                              | S22      |
| Fig. S14           | EDS spectra of three NCs                                                            | S23      |
| Fig. S15           | SEM micrographs and optical microscope image of three NCs                           | S24      |
| Fig. S16           | TEM image of <b>NC 3</b> and EDS analysis                                           | S25      |
| Fig. S17, S18, S19 | <sup>1</sup> H NMR of <b>NC 1</b> , <b>NC 2</b> , <b>NC 3</b>                       | S26-S28  |
| Fig. S20           | <sup>19</sup> F NMR of <b>NC 1</b> , <b>NC 2</b> , <b>NC 3</b>                      | S29      |
| Fig. S21           | FMO of <b>NC 1</b> and <b>NC 2</b>                                                  | S30      |
| Fig. S22           | Metal-metal distances in three NCs                                                  | S31      |
| Fig. S23           | Emission lifetime of <b>NC 3</b>                                                    | S32      |
| Fig. S24           | QTAIM molecular plots of three NCs                                                  | S33      |
| Fig. S25           | Temperature-dependent PL emission of <b>NC 3</b>                                    | S34      |
| Fig. S26           | Solid-state bandgap of each NC                                                      | S35      |
| Fig. S27           | Solid-state bandgap of each NC after 1 months of synthesis                          | S36      |
| Fig. S28           | Edge-to-edge and face-to-face distances of <b>NC 1</b> and <b>NC 3</b>              | S37      |
|                    | References                                                                          | S38      |

## Experimental

### Materials

Silver nitrate ( $\text{AgNO}_3$ ), silver trifluoroacetate ( $\text{CF}_3\text{COOAg}$ ), tert butylthiol ( $\text{HS}^t\text{Bu}$ ), tetra-n-butylammonium hexafluorophosphate, tetrakis(acetonitrile)copper(I) tetrafluoroborate ( $\text{Cu}(\text{CH}_3\text{CN})_4\text{BF}_4$ ) were procured from Sigma-Aldrich. HPLC grade solvents- triethylamine ( $\text{Et}_3\text{N}$ ), dimethylacetamide (DMA), dimethylformamide (DMF), dichloromethane (DCM), acetonitrile (ACN), ethanol (EtOH) and methanol (MeOH) were purchased from Spectrochem.

### X-ray Crystallography Details

Bruker Axs Kappa Apex II SCXRD (single crystal X-ray diffractometer) with CCD detector (MoK $\alpha$  radiation,  $\lambda = 0.71073 \text{ \AA}$ ) was used here. The crystal structures were solved by SHELXT 2014 and refined by the full matrix least-squares method using SHELXL 2018 present in the program suite WinGX (version 2014.1).<sup>S1-S3</sup> All non-hydrogen atoms were refined anisotropically and hydrogen atoms were (positioned geometrically) refined isotropically using an olex2.<sup>S4</sup>

### Computational Details

All the structures optimizations have done using DFT method in Gaussian 09 software.<sup>S5</sup> The B3LYP functional with Pople's 6-31G\* basis set<sup>S6,S7</sup> and LANL2DZ effective core potential (ECP)<sup>S8,S9</sup> were used for the nonmetallic elements (S, F, O, N, C and H) and metal (Ag, Cu), respectively. The TD-DFT has performed for electronic absorption spectra with the scanning of 300 excited state. We have used conductor like polarizable continuum solvent model for all the considered NCs.<sup>S10</sup> The non-covalent interaction (NCI) plot and critical points were performed through the reduced density gradient (RDG) using the quantum theory of atoms in molecules (QTAIM) method implemented in the Multiwfn program (version-3.8).<sup>S11,S12</sup> Besides, the Kohn-Sham orbital analysis has been performed for the understanding of core and ligands orbital contribution in the frontier molecular orbitals using Multiwfn program.<sup>S11</sup>

The projected density of states (PDOS) calculation for the compounds at the bulk level is carried out using Vienna Ab-Initio Simulation Package (VASP) for all the three NCs by using Generalized gradient approximation of Perdew–Burke–Ernzerhof (PBE) functional.<sup>S13,S14</sup> Projector augmented wave (PAW) method has been applied for the consideration of interaction between core and valence electrons.<sup>S14</sup> The energy cut-off of 470 eV has been implemented for

geometry optimization. The ionic relaxations have been carried out using a conjugate gradient algorithm with convergence criteria of  $10^{-5}$  eV/Å for minimum energy and  $\leq 0.05$  eV/Å for Hellmann-Feynman forces on atoms. Due to the large size of the unit cells of the compounds, the Brillouin zone was sampled at the Gamma point of (1×1×1). For the PDOS calculation, a higher (2×2×2) K-point is used.

## **Instrumentation**

UV-vis spectroscopy was carried out on a UV-3800 SHIMADZU UV-vis/NIR spectrometer. Emission measurements were performed using a Fluorolog-3 spectrofluorimeter from Horiba Jobin Yvon. The relative quantum yield was determined by the best match of the excitation wavelength of a well-known chromophore such as pyrene with the NC and the excitation was fixed at 317 nm. The concentration of the chloroform solutions was fixed by adjusting the absorption 0.05 OD and measured the quantum yield at room temperature. A picosecond time-correlated single-photon counting (TCSPC) system (Horiba Jobin Yvon-IBH) was utilized for the measurement of emission lifetime after excitation with a 340 nm pulsed diode laser. FEI Tecnai G2 F30 S-Twin transmission electron microscope (TEM) 300 KV and FEI Nova NANOSEM 450 (with EDS) were used for the microscopic characterization. X-ray photoelectron spectroscopy (XPS) measurements have been done using the Omicron Nano tech instrument (MgK $\alpha$  radiation at 1253.6 eV). All binding energies were referenced to the neutral C 1s peak at 284.8 eV. Cyclic voltammogram (CV) were measured on a CH instrument with a three-electrode system where glassy carbon electrode (GCE) was used as a working electrode, graphite electrode served as a counter electrode and silver wire was used as a reference electrode in DCM with 0.05 M tetra-n-butylammonium hexafluorophosphate salt was added as an electrolyte. We have calibrated against the standard reference electrode (Ag/Ag<sup>+</sup>). A Bruker Avance III, 500 MHz, NMR was used. The electrical measurement was done by using a Keithley 6712 electrometer.

## **ESI-MS measurement**

Waters Q-TOF mass spectrometer equipped with a Z-spray source was used for the electrospray ionization (ESI) mass spectrometry measurement with positive mode. NC 1 crystals were dissolved in DCM (1 mg/mL) and diluted by acetonitrile (1:1). The solution was infused at 20  $\mu$ L/min for positive mode. The spectrometer was operated in the mass range of m/z 2000–5000 for positive mode.

| <b>Instrument parameters</b> | <b>ES+ (positive mode)</b> |
|------------------------------|----------------------------|
| Capillary (kV)               | 2.9000                     |
| Sampling Cone                | 146.0000                   |
| Source Temperature (°C)      | 70                         |
| Source Offset                | 30                         |
| Desolvation Temperature (°C) | 100                        |
| Cone Gas Flow (L/Hr)         | 153                        |
| Desolvation Gas Flow (L/Hr)  | 214                        |

The **NC 2** was dissolved in DCM (1 mg/mL) and diluted by acetonitrile (1:1). The solution was infused at 25  $\mu$ L/min for positive mode. The spectrometer was operated in the mass range of m/z 2000–5000 for positive mode.

| <b>Instrument parameters</b> | <b>ES+ (positive mode)</b> |
|------------------------------|----------------------------|
| Capillary (kV)               | 2.6000                     |
| Sampling Cone                | 143.0000                   |
| Source Temperature (°C)      | 70                         |
| Source Offset                | 50                         |
| Desolvation Temperature (°C) | 100                        |
| Cone Gas Flow (L/Hr)         | 142                        |
| Desolvation Gas Flow (L/Hr)  | 292                        |

The **NC 3** was dissolved in DCM (1mg/ml) and diluted by acetonitrile (1:1). The solution was infused at 25  $\mu$ L/min for positive mode. The spectrometer was operated in the mass range of m/z 2000–5000 for positive mode.

| <b>Instrument parameters</b> | <b>ES+ (positive mode)</b> |
|------------------------------|----------------------------|
| Capillary (kV)               | 3.4400                     |
| Sampling Cone                | 117.0000                   |
| Source Temperature (°C)      | 70                         |
| Source Offset                | 39                         |
| Desolvation Temperature (°C) | 100                        |
| Cone Gas Flow (L/Hr)         | 157.0                      |
| Desolvation Gas Flow (L/Hr)  | 631.0                      |

**Table S1.** Crystal data and structure refinement parameters of **NC 1**.

|                                   |                                                                                                                                       |
|-----------------------------------|---------------------------------------------------------------------------------------------------------------------------------------|
| Identification code               | <b>NC 1</b>                                                                                                                           |
| CCDC number                       | 2183686                                                                                                                               |
| Empirical formula                 | $C_{68}H_{114}Ag_{20}F_{24}N_4O_{18}S_{11}$                                                                                           |
| Formula weight                    | 4241.69                                                                                                                               |
| Temperature                       | 150 K                                                                                                                                 |
| Wavelength                        | 0.71073 Å                                                                                                                             |
| Crystal system                    | Monoclinic                                                                                                                            |
| Space group                       | $P2_1/n$                                                                                                                              |
| Unit cell dimensions              | $a = 16.3357(12)$ Å; $b = 16.1055(12)$ Å, $c = 23.5813(17)$ Å; $\alpha = 90^\circ$ ; $\beta = 94.397(10)^\circ$ ; $\gamma = 90^\circ$ |
| Volume                            | 6185.9(8) Å <sup>3</sup>                                                                                                              |
| Z                                 | 2                                                                                                                                     |
| Density                           | 2.277 mg/m <sup>3</sup>                                                                                                               |
| Absorption coefficient            | 3.356 mm <sup>-1</sup>                                                                                                                |
| F(000)                            | 4052                                                                                                                                  |
| Crystal size                      | 0.095 × 0.050 × 0.038 mm                                                                                                              |
| Theta range for data collection   | 2.410 to 28.050°                                                                                                                      |
| Limiting indices                  | -21 ≤ h ≤ 21, -21 ≤ k ≤ 21, -31 ≤ l ≤ 31                                                                                              |
| Reflections collected             | 89860                                                                                                                                 |
| Independent reflections           | 15437 [R(int) = 0.0959]                                                                                                               |
| Completeness to theta = 25.242°   | 99.9 %                                                                                                                                |
| Refinement method                 | Full-matrix least-squares on F <sup>2</sup>                                                                                           |
| Data / restraints / parameters    | 15437 / 42 / 648                                                                                                                      |
| Goodness-of-fit on F <sup>2</sup> | 1.044                                                                                                                                 |
| Final R indices [I > 2σ(I)]       | R <sub>1</sub> = 0.0717, wR <sub>2</sub> = 0.1881                                                                                     |
| R indices (all data)              | R <sub>1</sub> = 0.1295, wR <sub>2</sub> = 0.2219                                                                                     |
| Largest diff. peak and hole       | 3.541 and -3.380 e. Å <sup>-3</sup>                                                                                                   |

**Table S2.** Crystal data and structure refinement parameters of **NC 2**.

|                                        |                                                                                                                                   |
|----------------------------------------|-----------------------------------------------------------------------------------------------------------------------------------|
| Identification code                    | <b>NC 2</b>                                                                                                                       |
| CCDC number                            | 2183687                                                                                                                           |
| Empirical formula                      | $C_{69}H_{118}Ag_{20}F_{24}N_4O_{24}S_{10}$                                                                                       |
| Formula weight                         | 4321.67                                                                                                                           |
| Temperature                            | 150 K                                                                                                                             |
| Wavelength                             | 0.71073 Å                                                                                                                         |
| Crystal system                         | Monoclinic                                                                                                                        |
| Space group                            | $P2_1/c$                                                                                                                          |
| Unit cell dimensions                   | $a = 15.4136(17)$ Å; $b = 30.794(3)$ Å, $c = 28.051(3)$ Å; $\alpha = 90^\circ$ ; $\beta = 103.798(2)^\circ$ ; $\gamma = 90^\circ$ |
| Volume                                 | $12930(2)$ Å <sup>3</sup>                                                                                                         |
| Z                                      | 4                                                                                                                                 |
| Density                                | $2.220$ mg/m <sup>3</sup>                                                                                                         |
| Absorption coefficient                 | $3.201$ mm <sup>-1</sup>                                                                                                          |
| F(000)                                 | 8272                                                                                                                              |
| Crystal size                           | $0.085 \times 0.078 \times 0.048$ mm                                                                                              |
| Theta range for data collection        | $0.998$ to $28.416^\circ$                                                                                                         |
| Limiting indices                       | $-20 \leq h \leq 20$ , $-41 \leq k \leq 41$ , $-37 \leq l \leq 36$                                                                |
| Reflections collected                  | 188717                                                                                                                            |
| Independent reflections                | 32294 [R(int) = 0.1480]                                                                                                           |
| Completeness to theta = $25.242^\circ$ | 100.0 %                                                                                                                           |
| Refinement method                      | Full-matrix least-squares on $F^2$                                                                                                |
| Data / restraints / parameters         | 32294 / 1580 / 1338                                                                                                               |
| Goodness-of-fit on $F^2$               | 1.025                                                                                                                             |
| Final R indices [I > 2sigma(I)]        | $R_1 = 0.0938$ , $wR_2 = 0.2318$                                                                                                  |
| R indices (all data)                   | $R_1 = 0.2141$ , $wR_2 = 0.2987$                                                                                                  |
| Largest diff. peak and hole            | $4.030$ and $-1.698$ e. Å <sup>-3</sup>                                                                                           |

**Table S3.** Crystal data and structure refinement parameters of **NC 3**.

|                                   |                                                                                                                                     |
|-----------------------------------|-------------------------------------------------------------------------------------------------------------------------------------|
| Identification code               | <b>NC 3</b>                                                                                                                         |
| CCDC number                       | 2183688                                                                                                                             |
| Empirical formula                 | $C_{162}H_{288}Ag_{40}Cu_2F_{48}N_{12}O_{48}S_{23}$                                                                                 |
| Formula weight                    | 9263.29                                                                                                                             |
| Temperature                       | 150 K                                                                                                                               |
| Wavelength                        | 0.71073 Å                                                                                                                           |
| Crystal system                    | Monoclinic                                                                                                                          |
| Space group                       | $P2_1/n$                                                                                                                            |
| Unit cell dimensions              | $a = 15.9453(15)$ Å; $b = 18.3040(17)$ Å, $c = 24.394(2)$ Å; $\alpha = 90^\circ$ ; $\beta = 105.548(2)^\circ$ ; $\gamma = 90^\circ$ |
| Volume                            | $6859.2(11)$ Å <sup>3</sup>                                                                                                         |
| Z                                 | 1                                                                                                                                   |
| Density                           | 2.243 mg/m <sup>3</sup>                                                                                                             |
| Absorption coefficient            | 3.197 mm <sup>-1</sup>                                                                                                              |
| F(000)                            | 4466                                                                                                                                |
| Crystal size                      | 0.040 × 0.037 × 0.028 mm                                                                                                            |
| Theta range for data collection   | 2.060 to 28.449°                                                                                                                    |
| Limiting indices                  | -21 ≤ h ≤ 21, -24 ≤ k ≤ 24, -32 ≤ l ≤ 32                                                                                            |
| Reflections collected             | 115684                                                                                                                              |
| Independent reflections           | 17208 [R(int) = 0.1553]                                                                                                             |
| Completeness to theta = 25.242°   | 99.9 %                                                                                                                              |
| Refinement method                 | Full-matrix least-squares on F <sup>2</sup>                                                                                         |
| Data / restraints / parameters    | 17208 / 126 / 797                                                                                                                   |
| Goodness-of-fit on F <sup>2</sup> | 1.027                                                                                                                               |
| Final R indices [I > 2sigma(I)]   | R <sub>1</sub> = 0.0626, wR <sub>2</sub> = 0.1452                                                                                   |
| R indices (all data)              | R <sub>1</sub> = 0.1504, wR <sub>2</sub> = 0.1831                                                                                   |
| Largest diff. peak and hole       | 2.603 and -1.723 e. Å <sup>-3</sup>                                                                                                 |



**Table S4.** The obtained radiative, nonradiative rate constants, quantum yield and lifetime of NC 3.

| <b>Temperature<br/>(K)</b> | <b>Relative<br/>quantum yield<br/>(<math>\phi</math>)</b> | <b>Lifetime<br/>(<math>\tau_{av}</math>) (ns)</b> | <b><math>k_r</math><br/>(<math>s^{-1}</math>)</b> | <b><math>k_{nr}</math><br/>(<math>s^{-1}</math>)</b> |
|----------------------------|-----------------------------------------------------------|---------------------------------------------------|---------------------------------------------------|------------------------------------------------------|
| 273                        | 0.25                                                      | 14                                                | $1.78 \times 10^7$                                | $5.35 \times 10^7$                                   |
| 298                        | 0.21                                                      | 12                                                | $1.75 \times 10^7$                                | $6.58 \times 10^7$                                   |
| 308                        | 0.11                                                      | 8                                                 | $1.37 \times 10^7$                                | $11.12 \times 10^7$                                  |

**Table S5.** Single-crystal conductivity of each NC.

| <b>Crystal Name</b> | <b>L<br/>(cm)</b> | <b>W<br/>(cm)<sup>2</sup></b> | <b>Conductance<br/>(S)</b> | <b>Conductivity<br/>(S. cm<sup>-1</sup>)</b> |
|---------------------|-------------------|-------------------------------|----------------------------|----------------------------------------------|
| <b>NC 1</b>         | 0.0017            | 0.034                         | $2.32 \times 10^{-7}$      | $1.2 \times 10^{-8}$                         |
| <b>NC 2</b>         | 0.0022            | 0.033                         | $2.57 \times 10^{-7}$      | $1.7 \times 10^{-8}$                         |
| <b>NC 3</b>         | 0.003             | 0.054                         | $1.1 \times 10^{-2}$       | $6.1 \times 10^{-4}$                         |

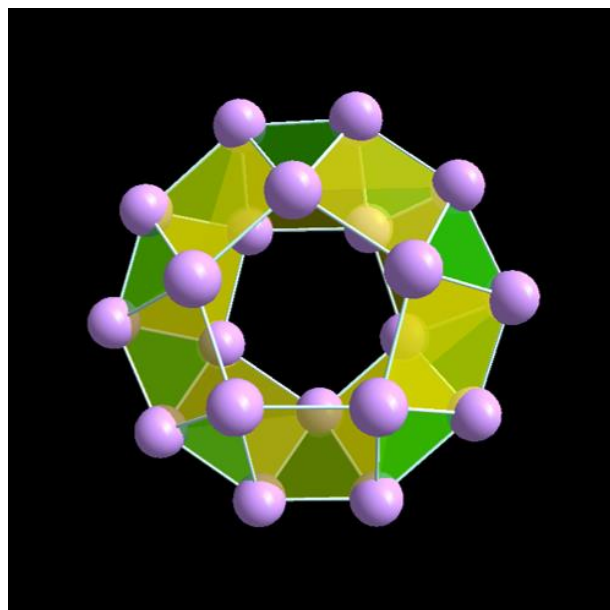

**Fig. S1** Doughnut-like  $\text{Ag}_{20}$  core.

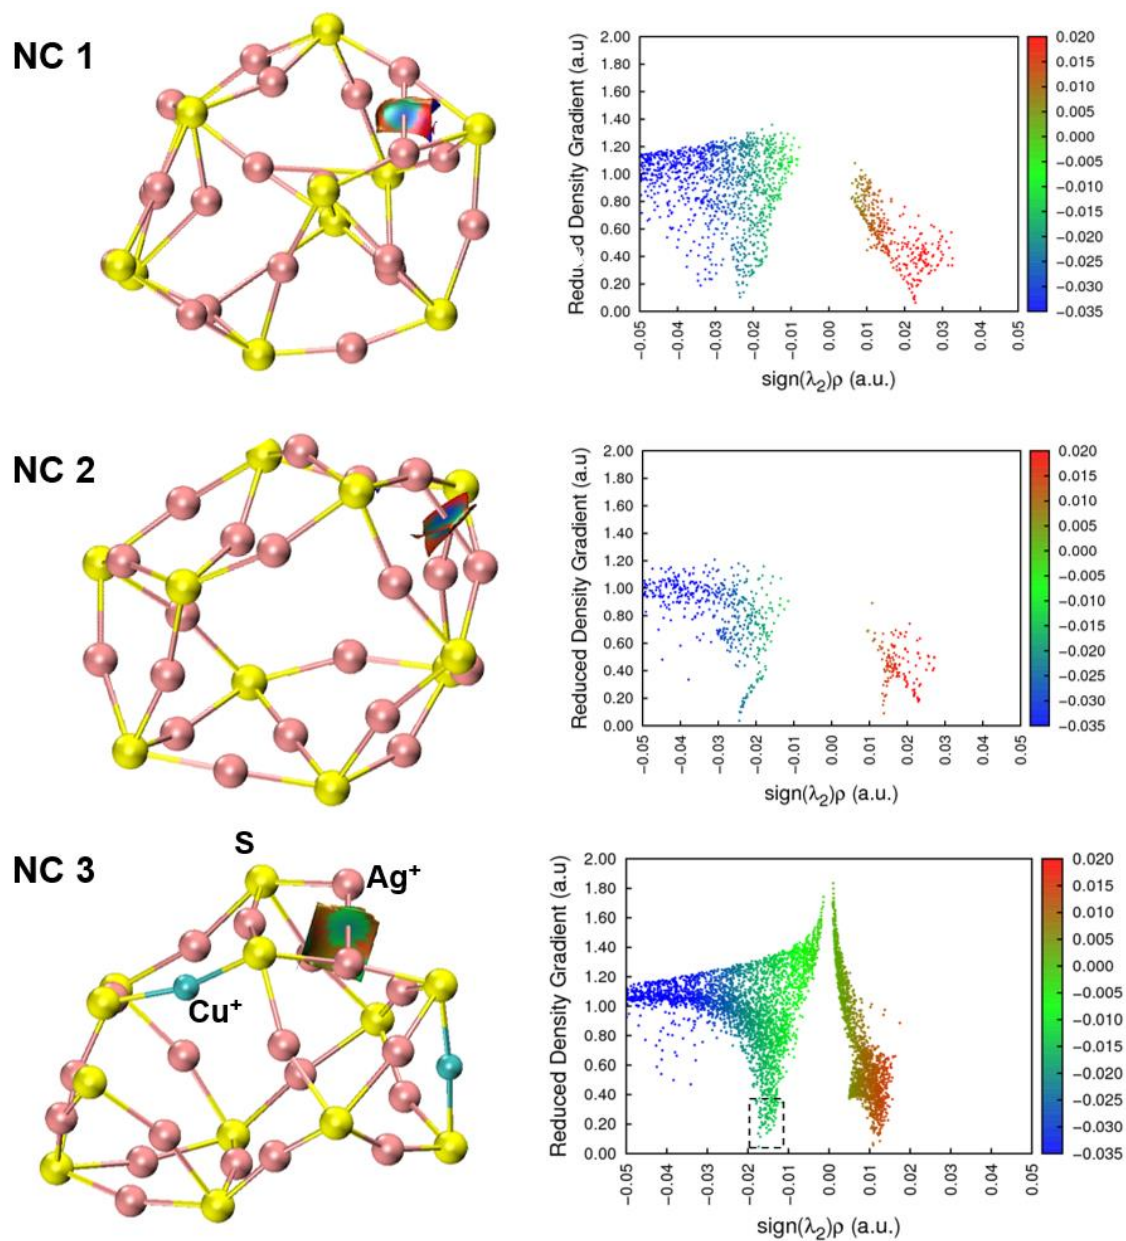

**Fig. S2** The Reduced Density Gradient (RDG) isosurface of argentophilic interaction and the associated corresponding scatter plot of (RDG vs.  $\text{sign}(\lambda_2)\rho$ ) of each NC. Where the green color in the plot indicates the presence of nonbonding interaction.

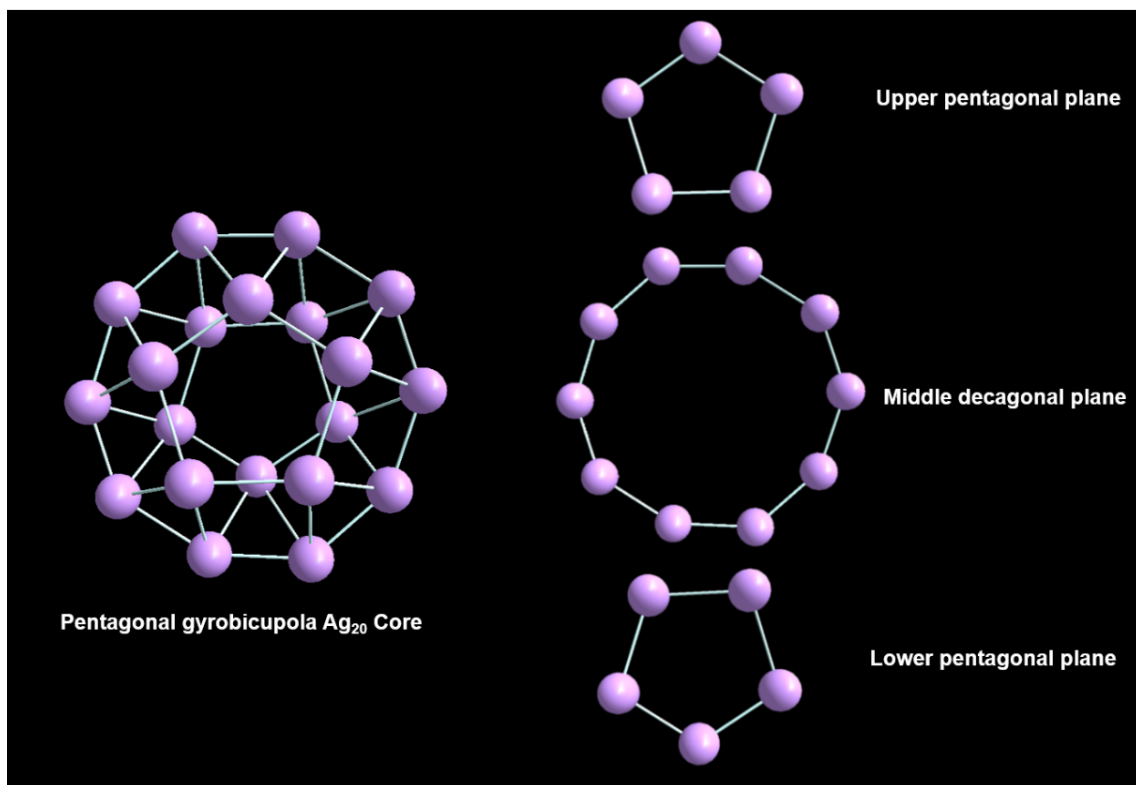

**Fig. S3** The three planes of  $\text{Ag}_{20}$  skeleton.

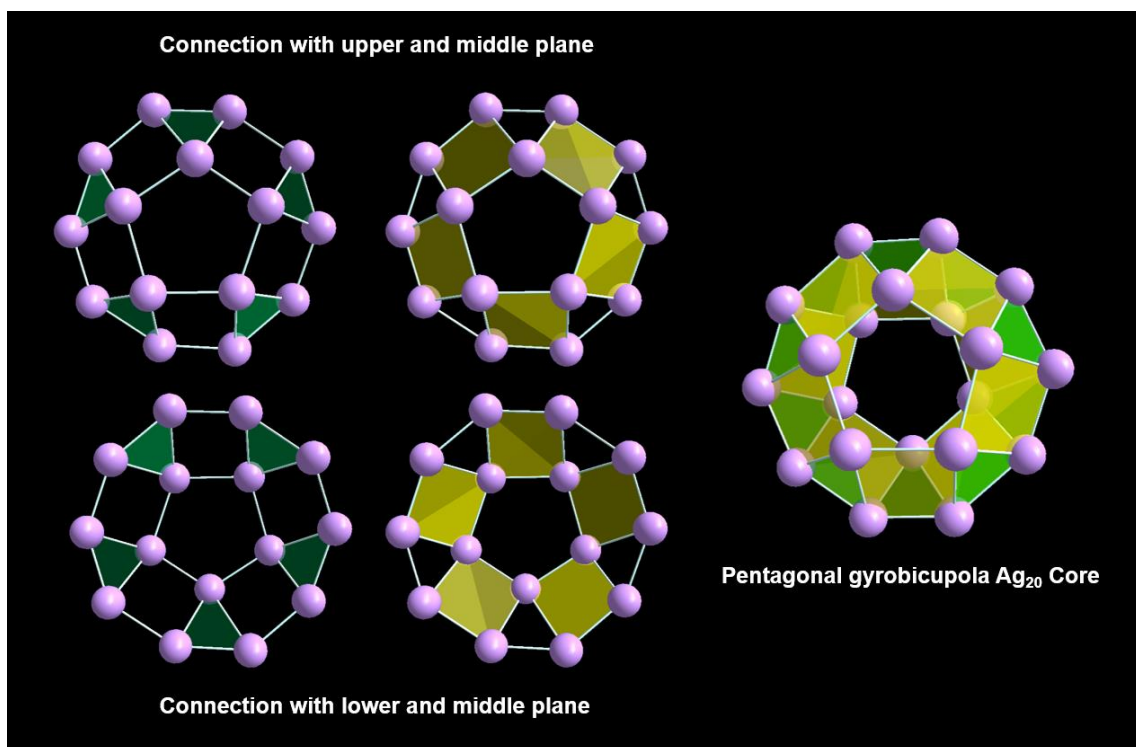

**Fig. S4** The middle plane of  $Ag_{20}$  core is connected with the other two planes through ten square and ten triangular facets.

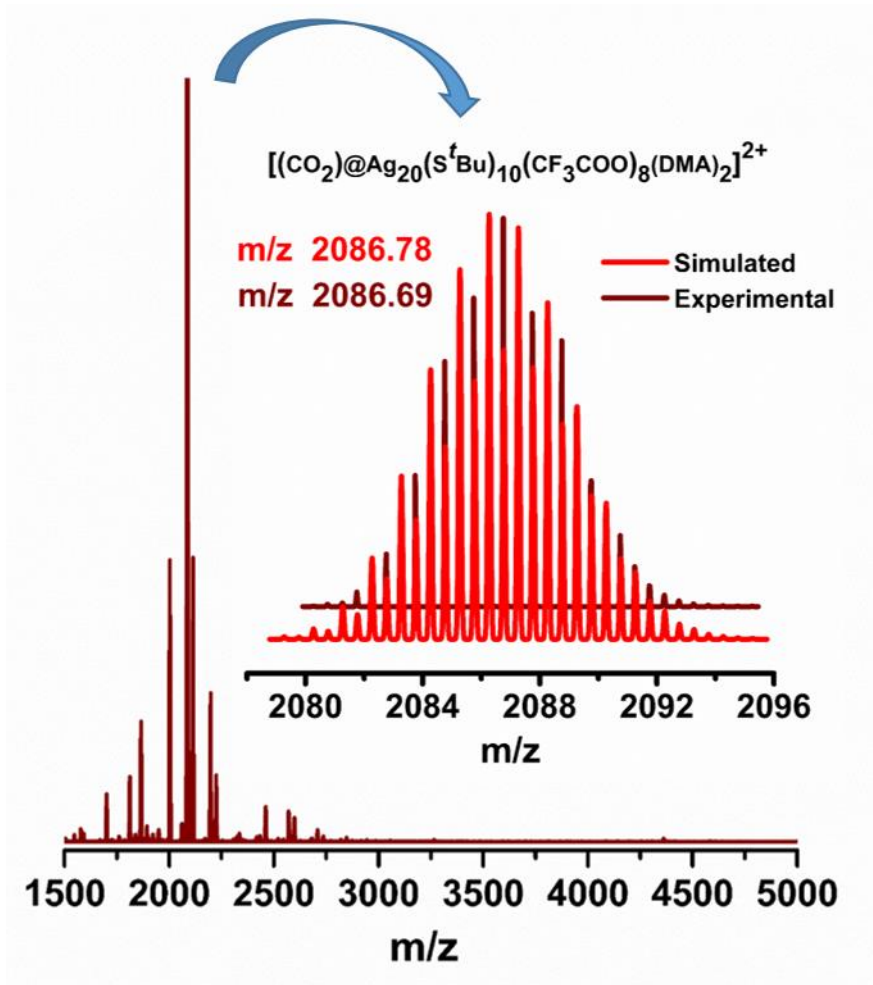

**Fig. S5** The positive-mode ESI-MS spectrum of the intermediate.

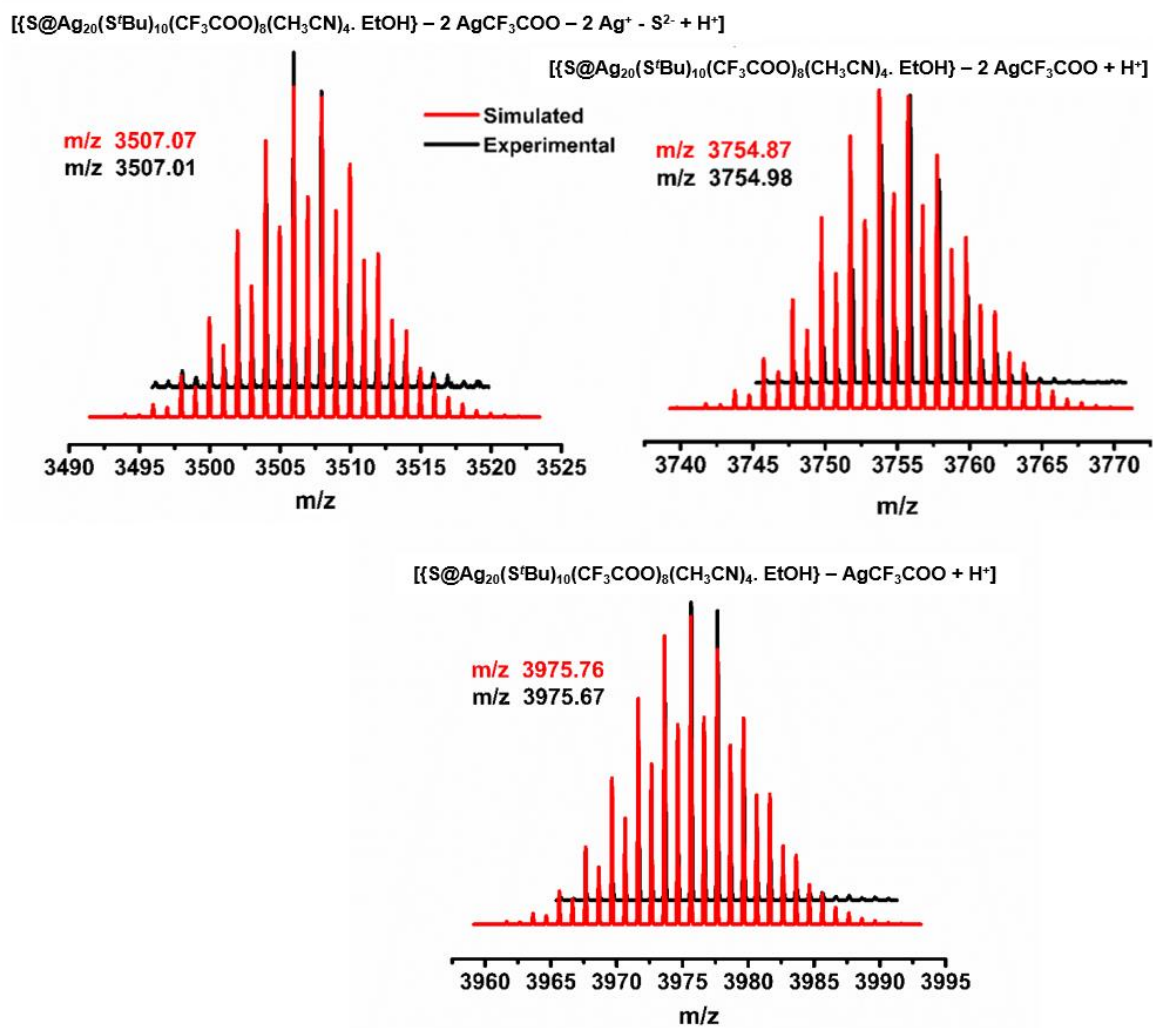

**Fig. S6** The associated fragments of NC 1 along with the peak experimental and simulated patterns.

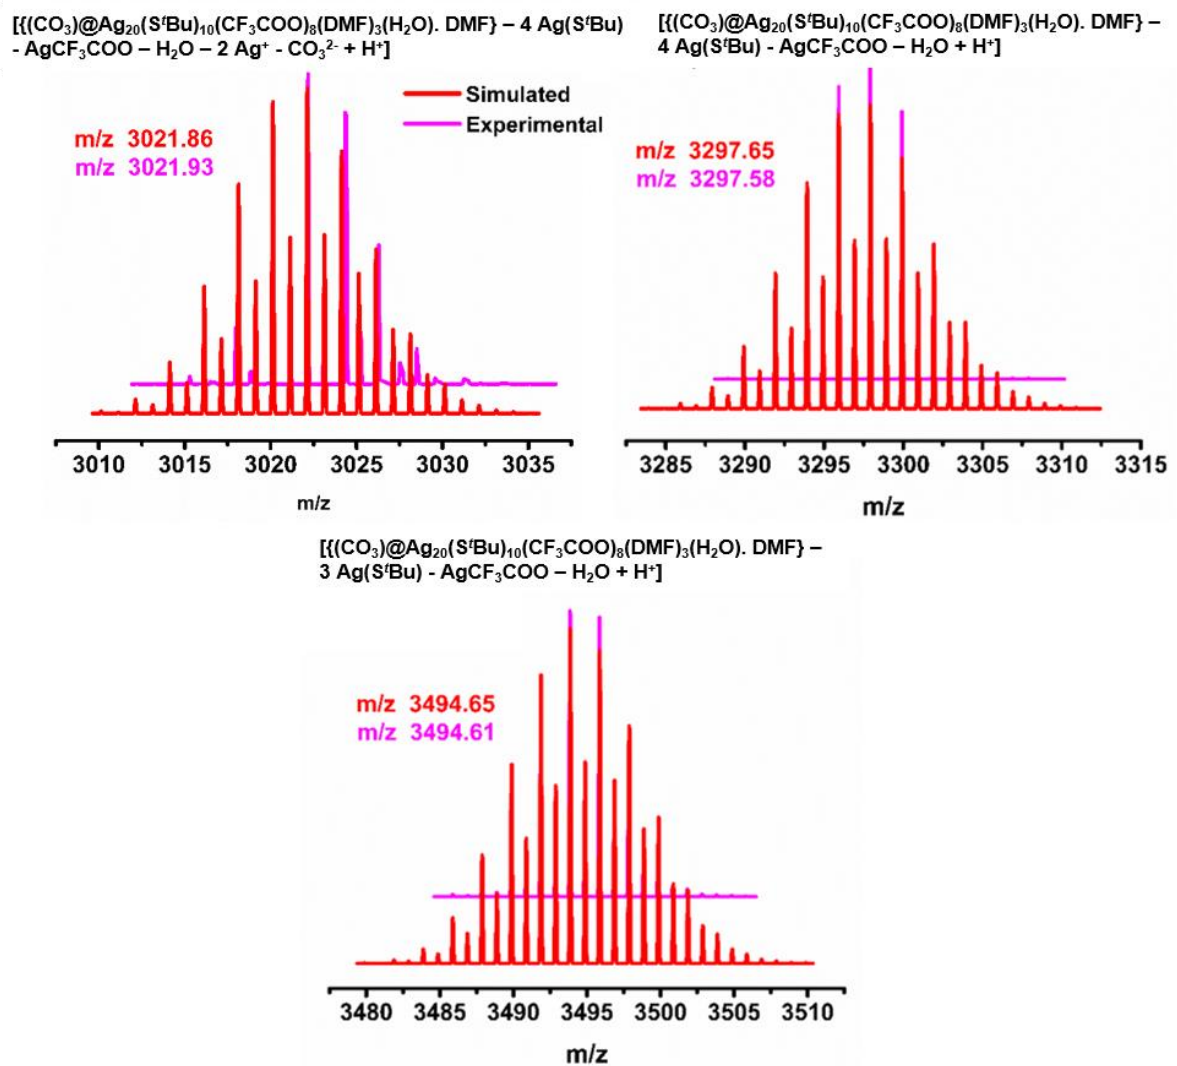

**Fig. S7** The associated fragments of NC 2 along with the peak experimental and simulated patterns.



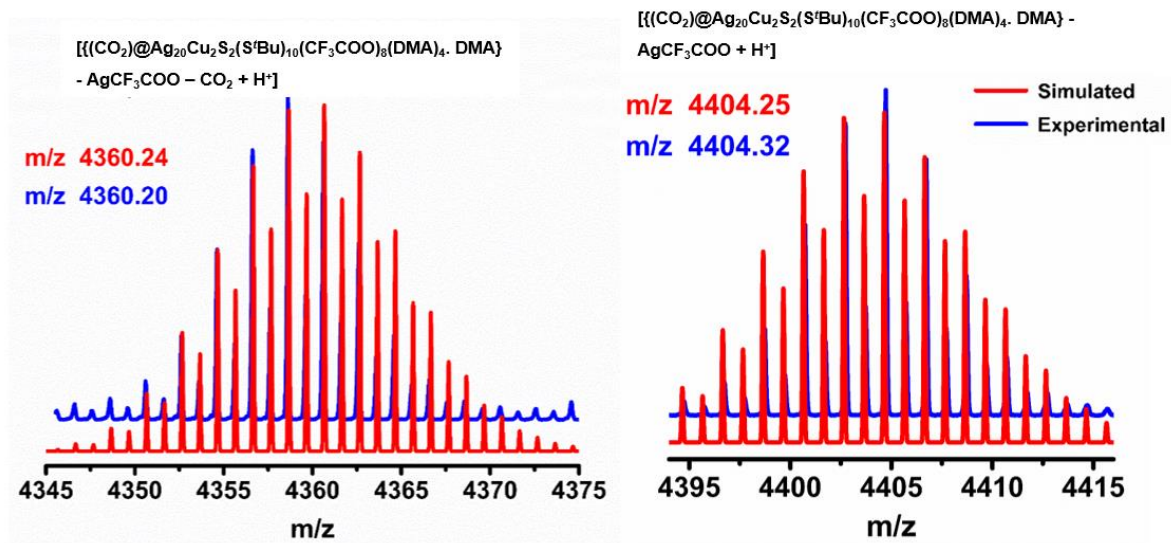

**Fig. S8** The associated fragments of **NC 3** along with the peak experimental and simulated patterns.

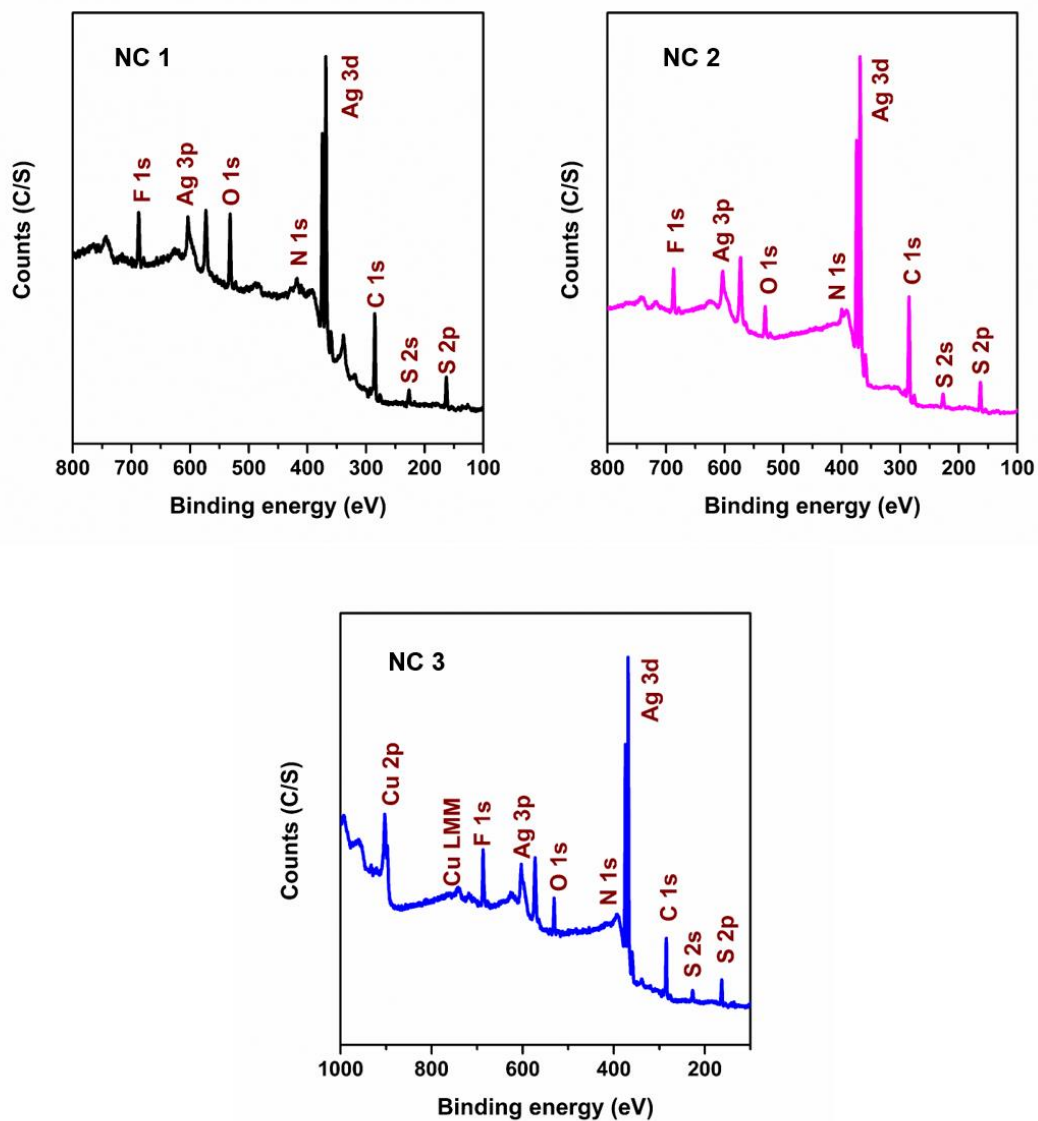

**Fig. S9** The XPS survey spectra of three NCs.

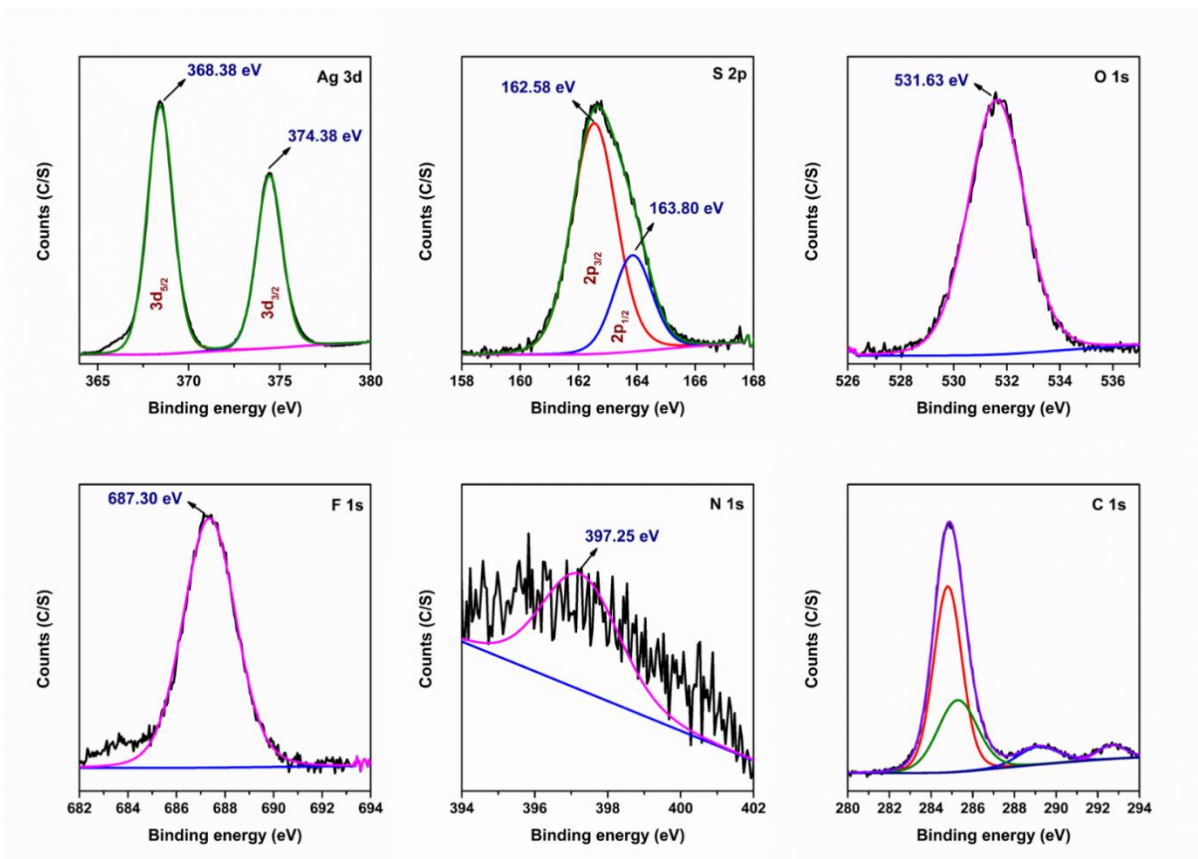

**Fig. S10** The deconvoluted XPS spectra of the NC 1.

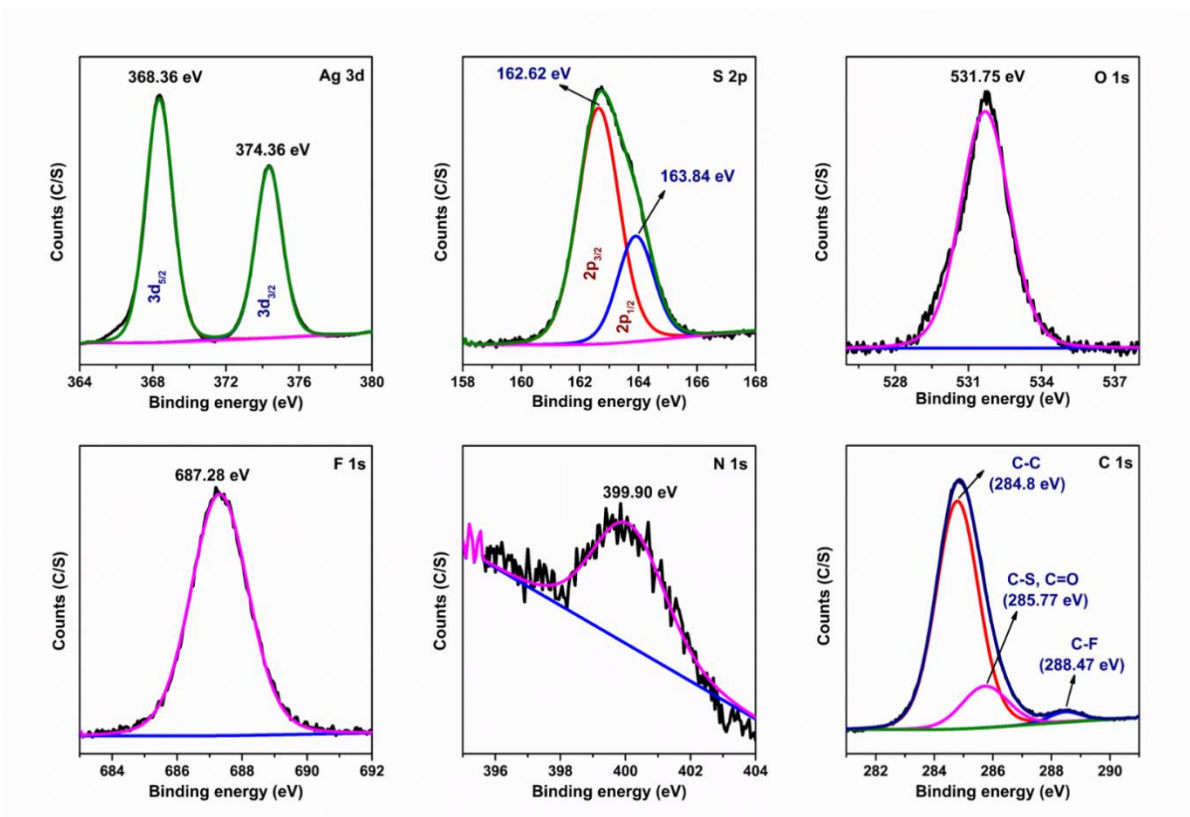

**Fig. S11** The deconvoluted XPS spectra of the NC 2.

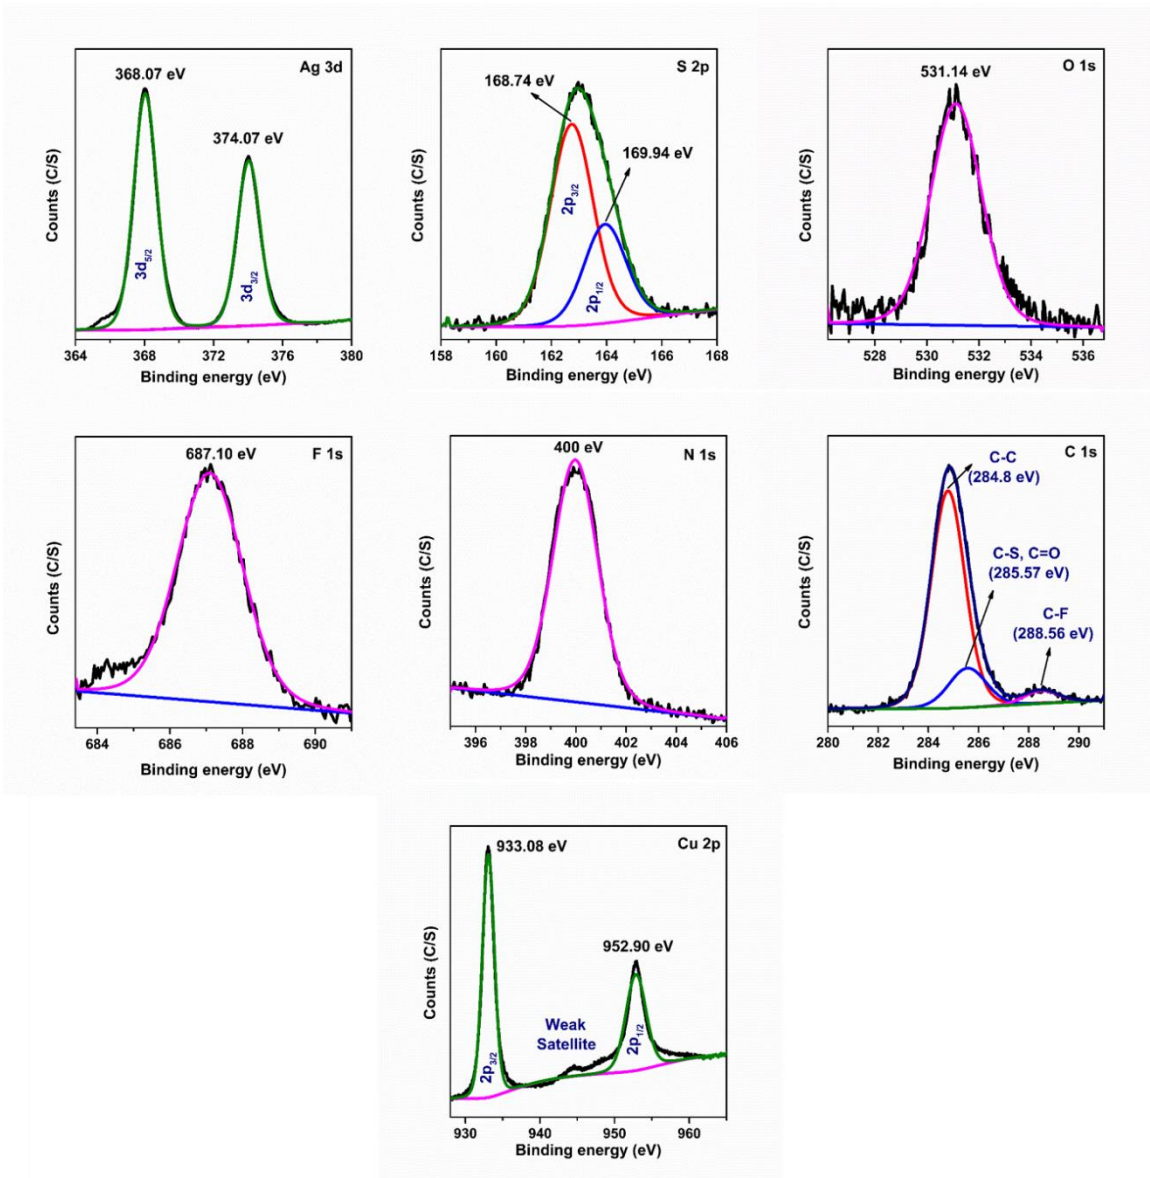

**Fig. S12** The deconvoluted XPS spectra of the NC 3.

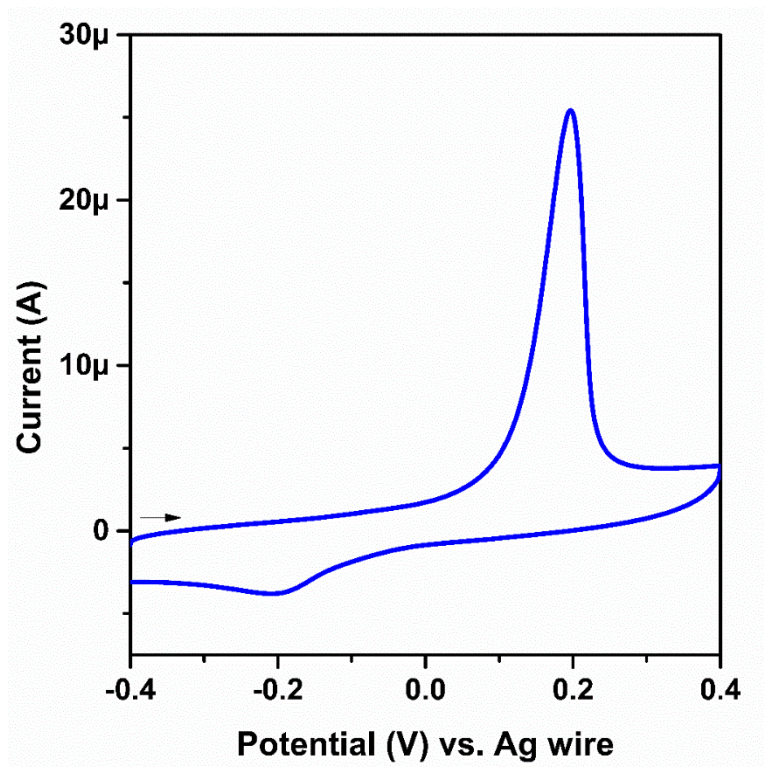

**Fig. S13** Cyclic-voltammetry plot of NC 3.

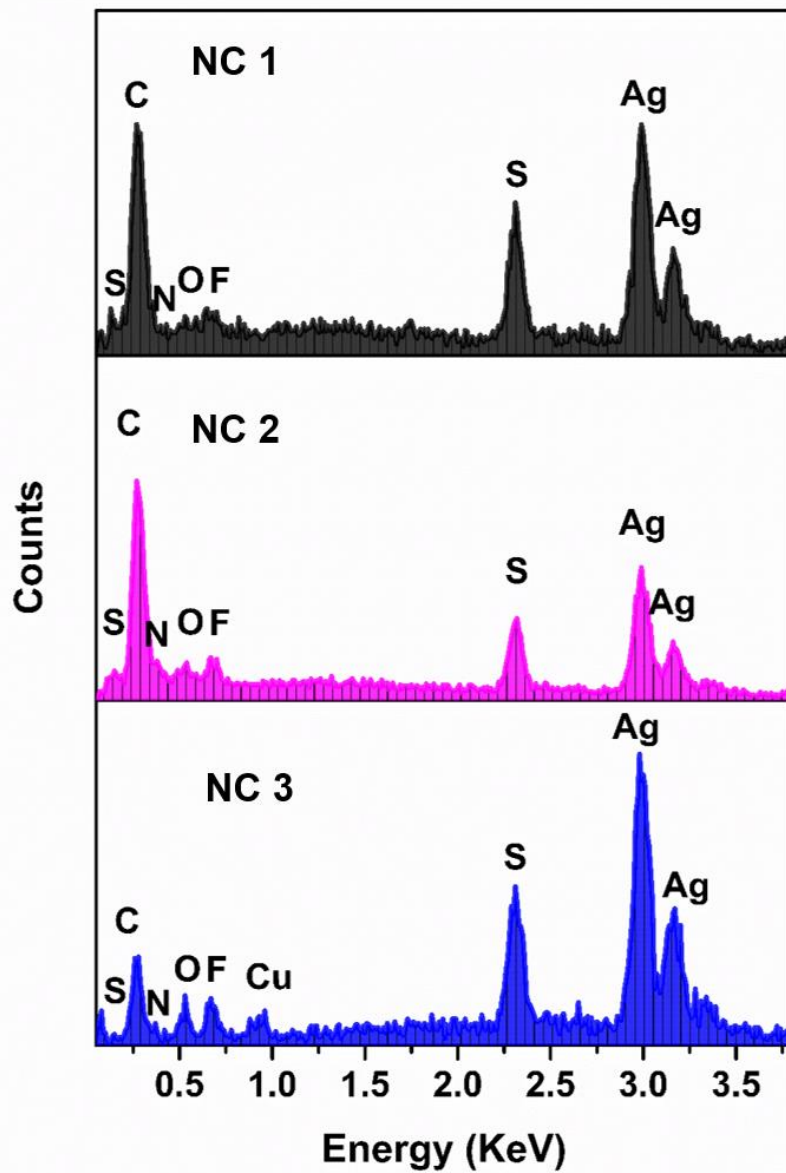

**Fig. S14** EDS spectra of three NCs.

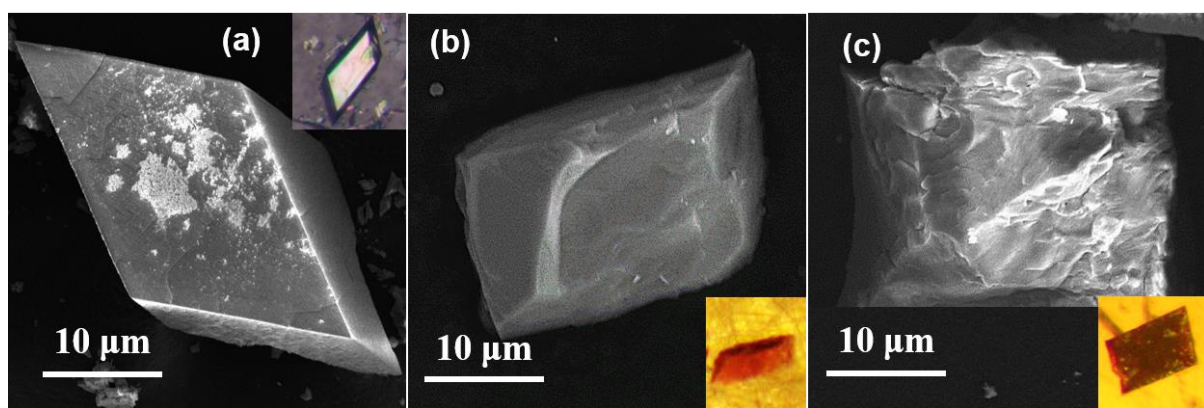

**Fig. S15** SEM micrographs of (a) **NC 1**, (b) **NC 2**, (c) **NC 3** and the corresponding insets showing the optical-microscope image of each NC crystal.



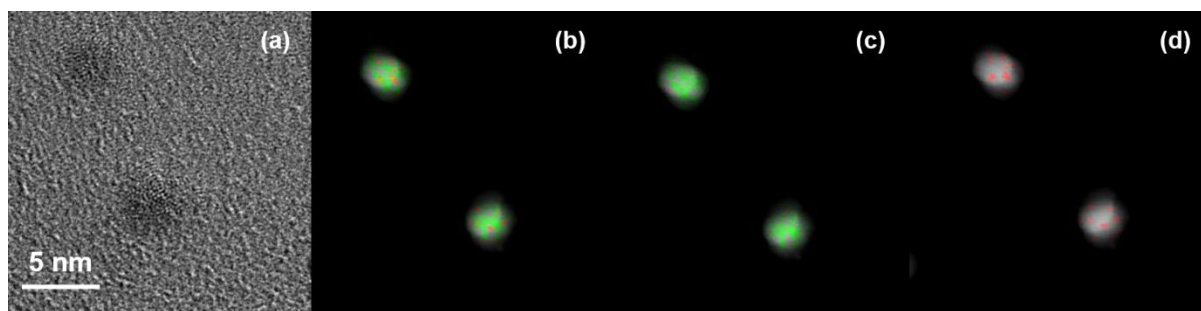

**Fig. S16** (a) TEM image of the **NC 3** and elemental mapping of (b) both Ag and Cu, (c) only Ag and (d) only Cu.

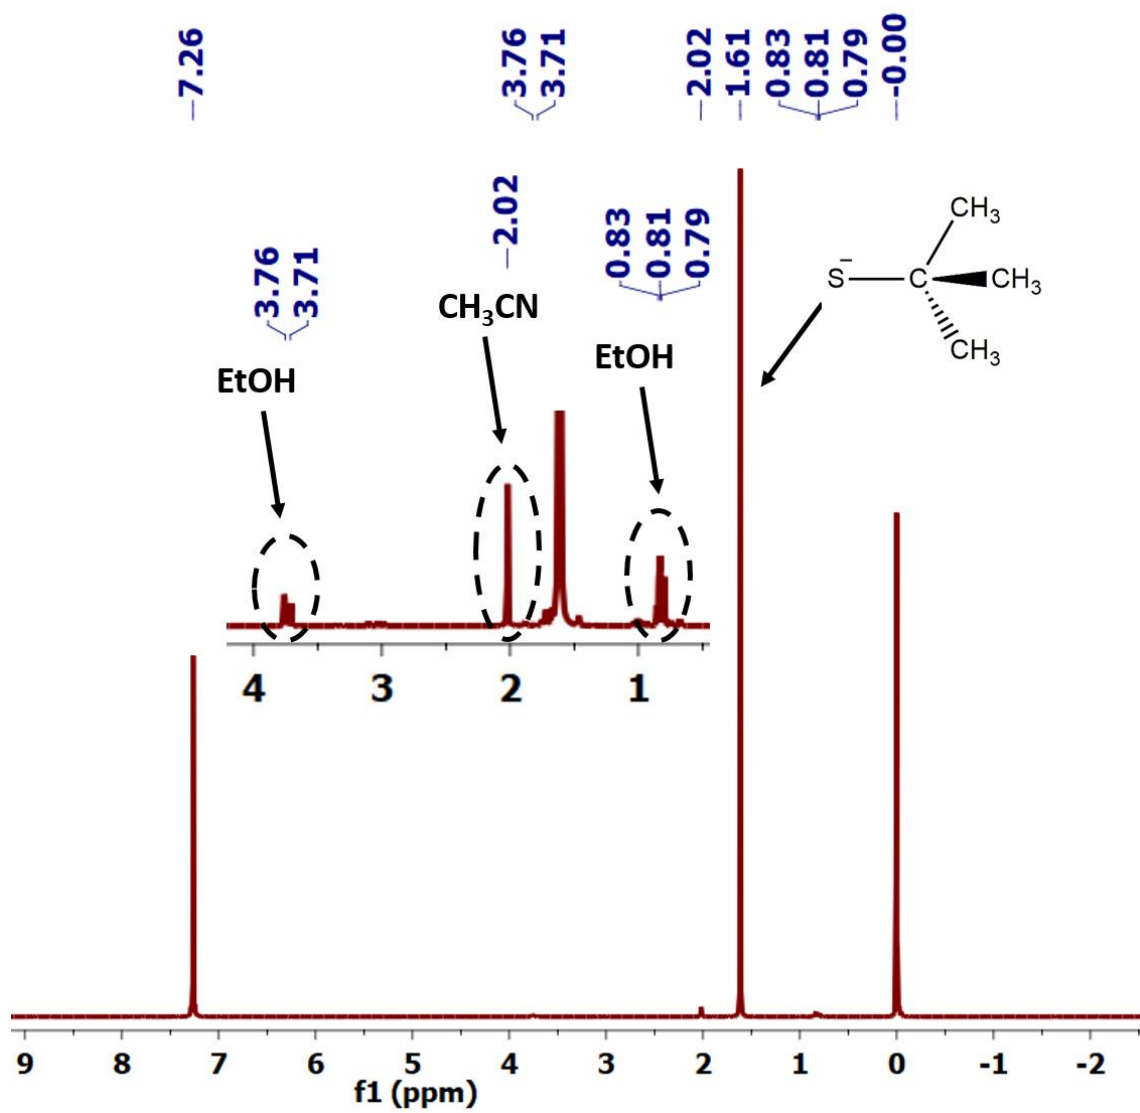

Fig. S17 The  $^1\text{H}$  NMR of NC 1 in  $\text{CDCl}_3$ .

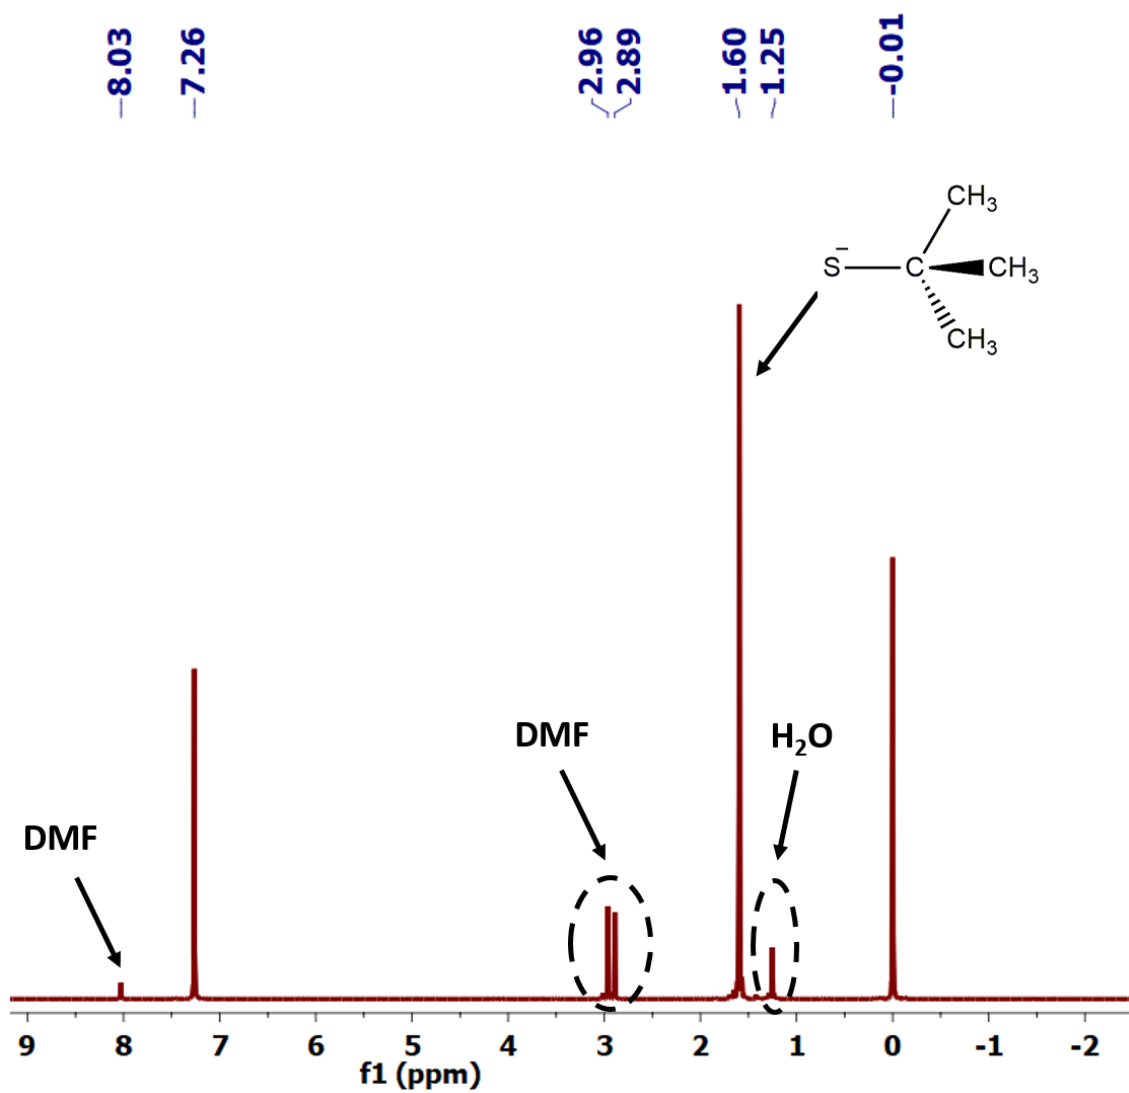

Fig. S18 The  $^1\text{H}$  NMR of NC 2 in  $\text{CDCl}_3$ .

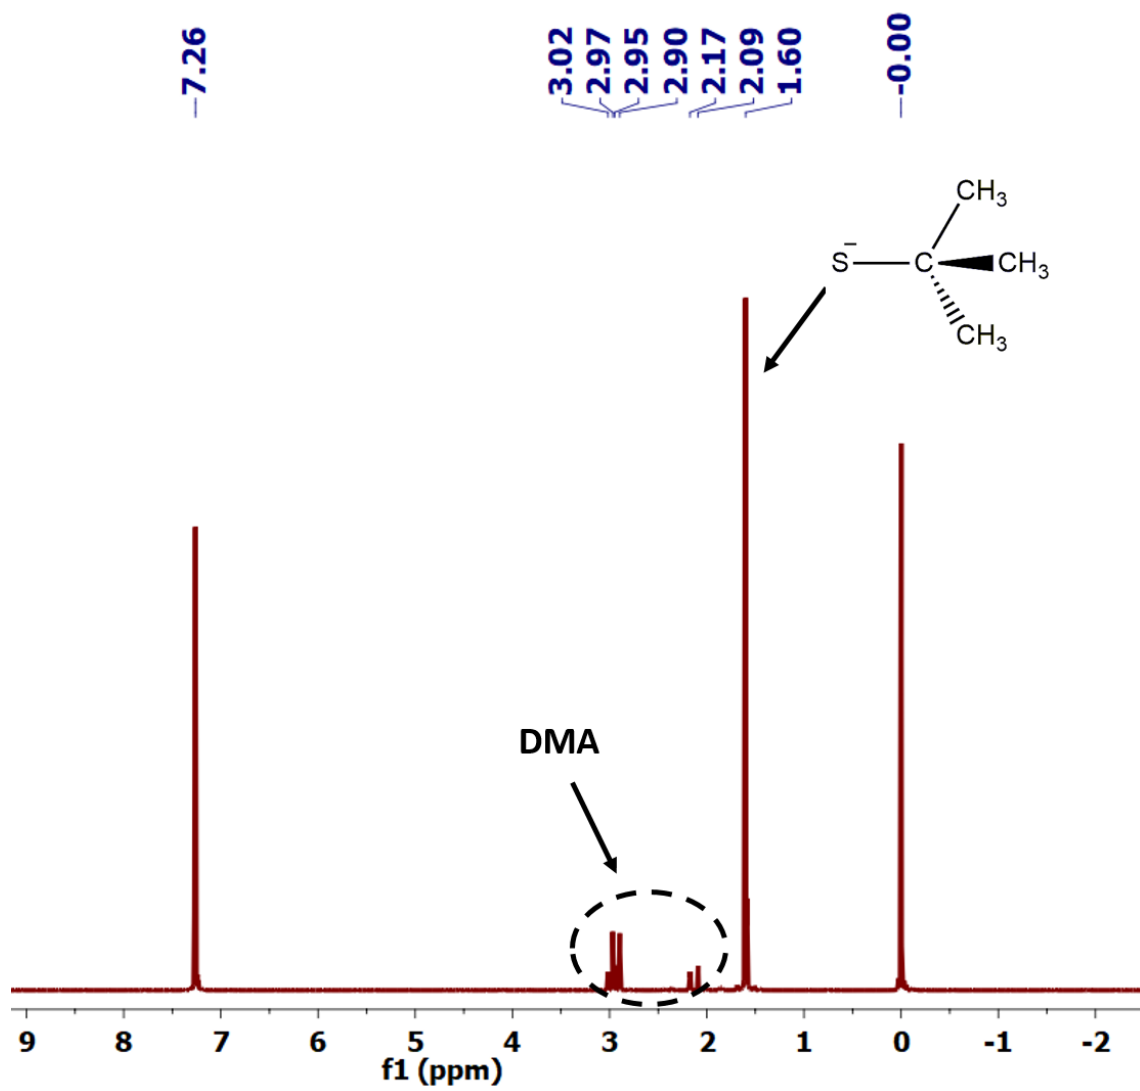

Fig. S19 The  $^1\text{H}$  NMR of NC 3 in  $\text{CDCl}_3$ .

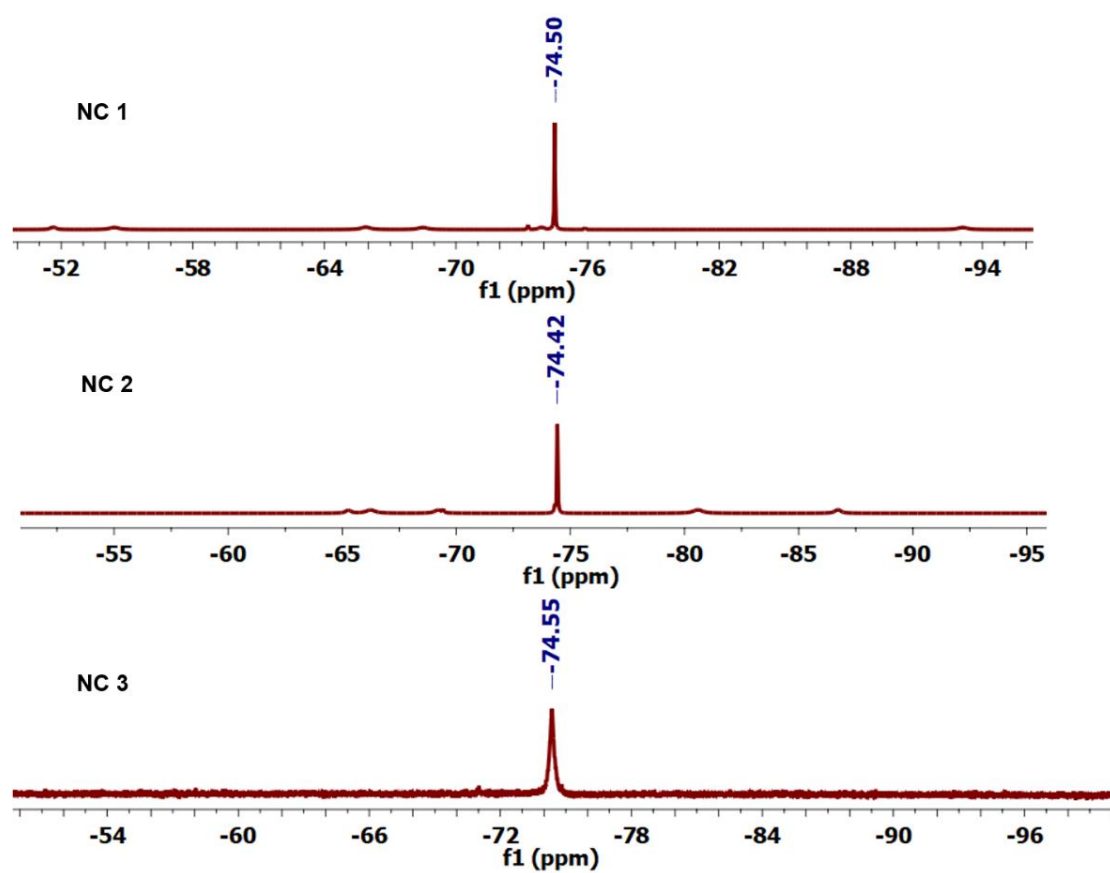

**Fig. S20** The  $^{19}\text{F}$  NMR of all NCs in  $\text{CDCl}_3$ .

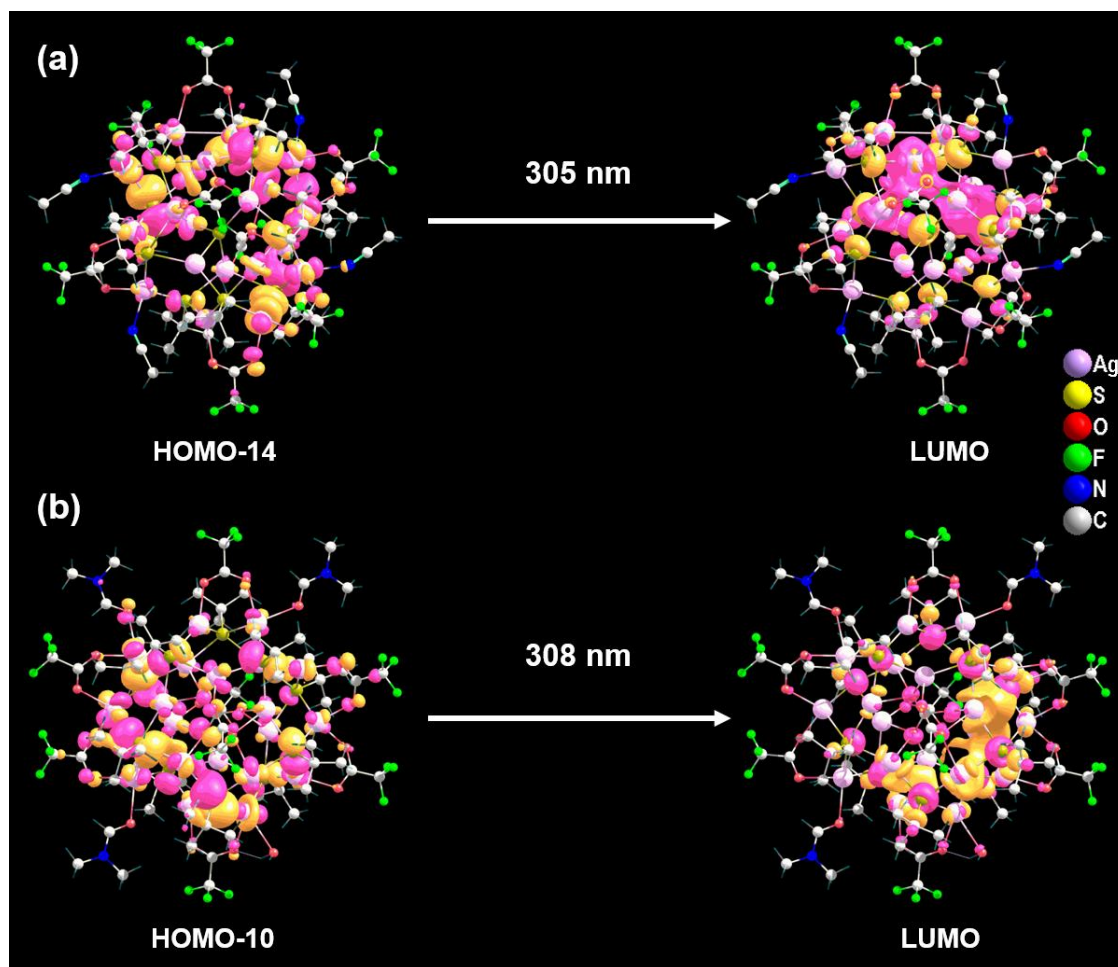

**Fig. S21** The FMO of (a) NC 1 and (b) NC 2.

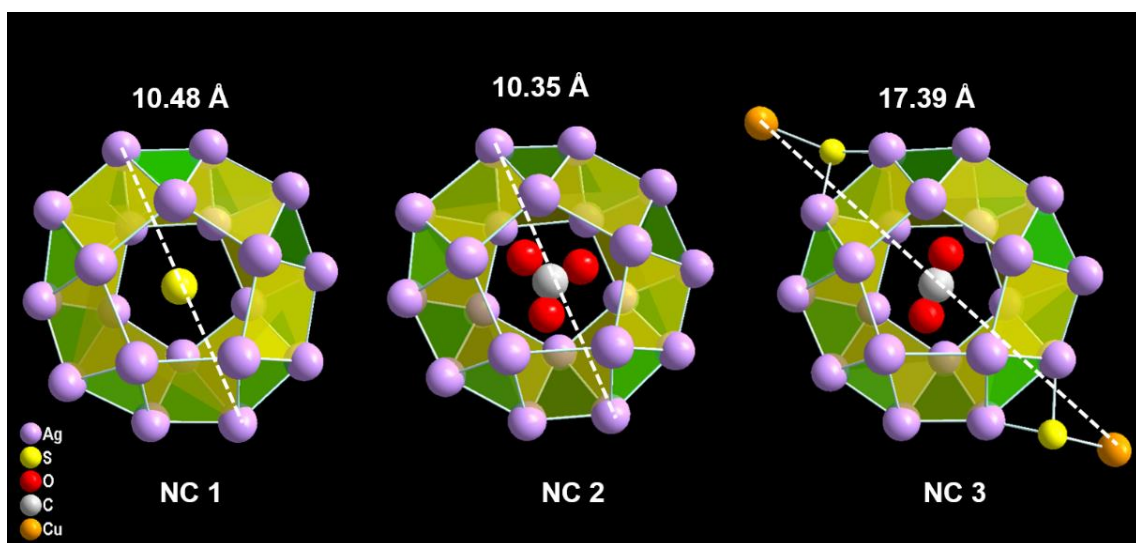

**Fig. S22** Metal-to-metal distances in three NCs.

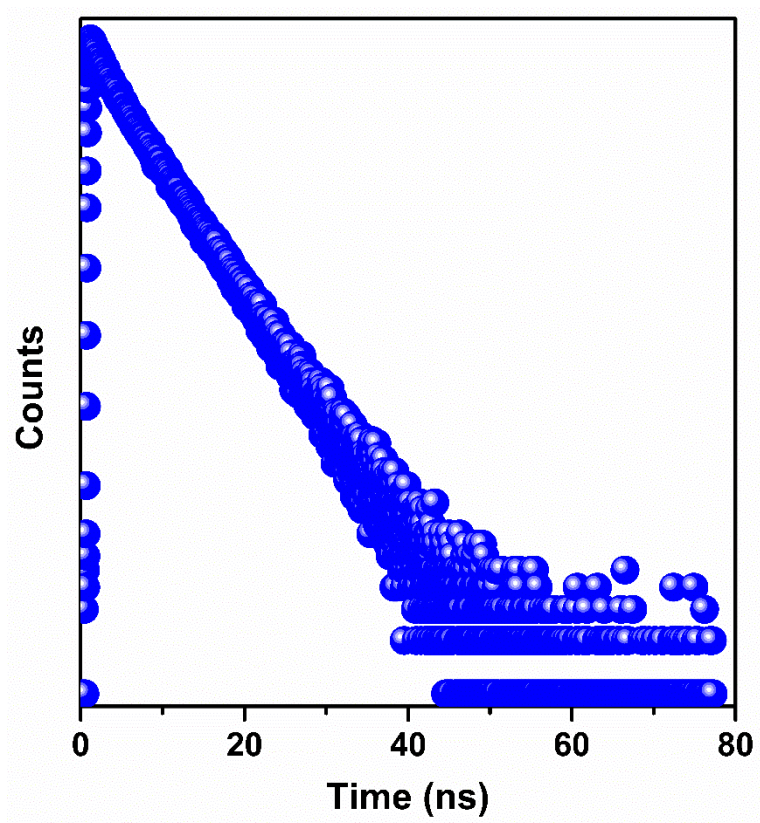

**Fig. S23** Emission lifetime of NC 3.



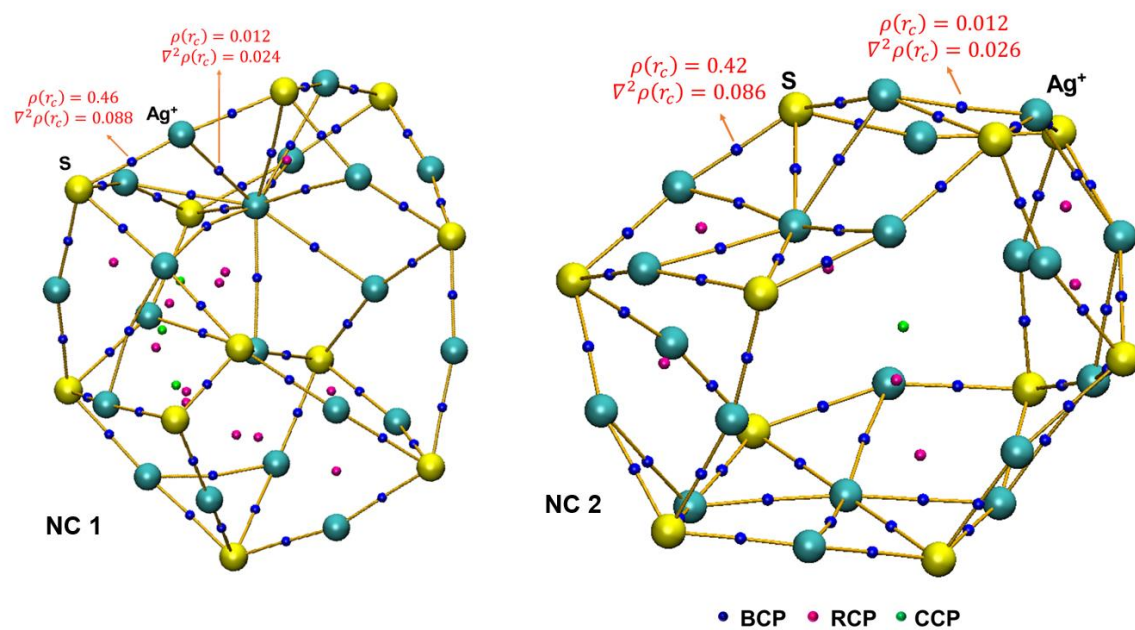

**Fig. S24** QTAIM molecular plot of bond critical point (BCP), ring critical point (RCP) and cage critical point (CCP) of NC 1 and NC 2. For clarity, we have removed the ligands.

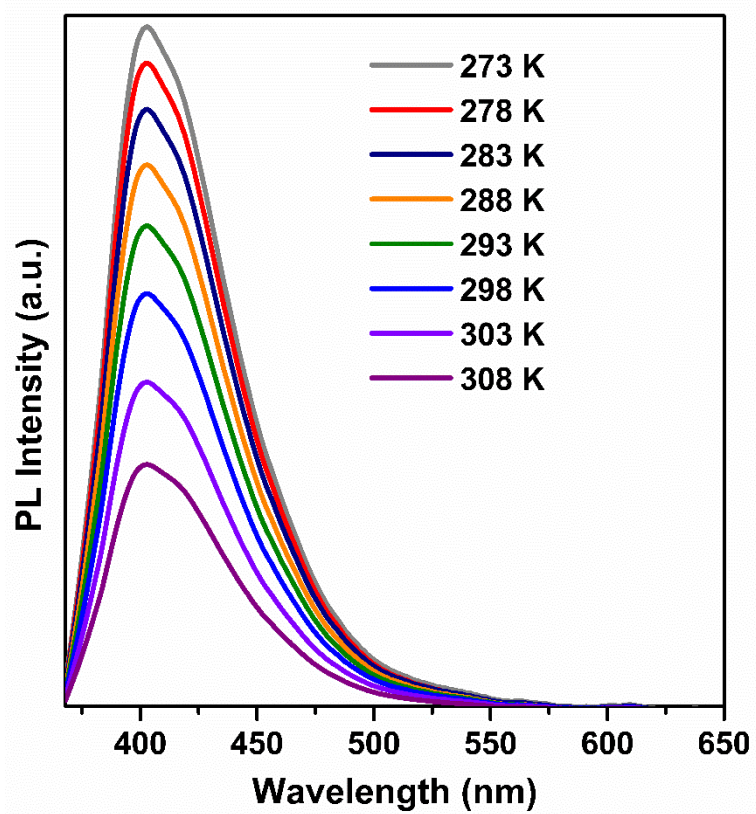

**Fig. S25** Temperature-dependent PL emission of NC 3.

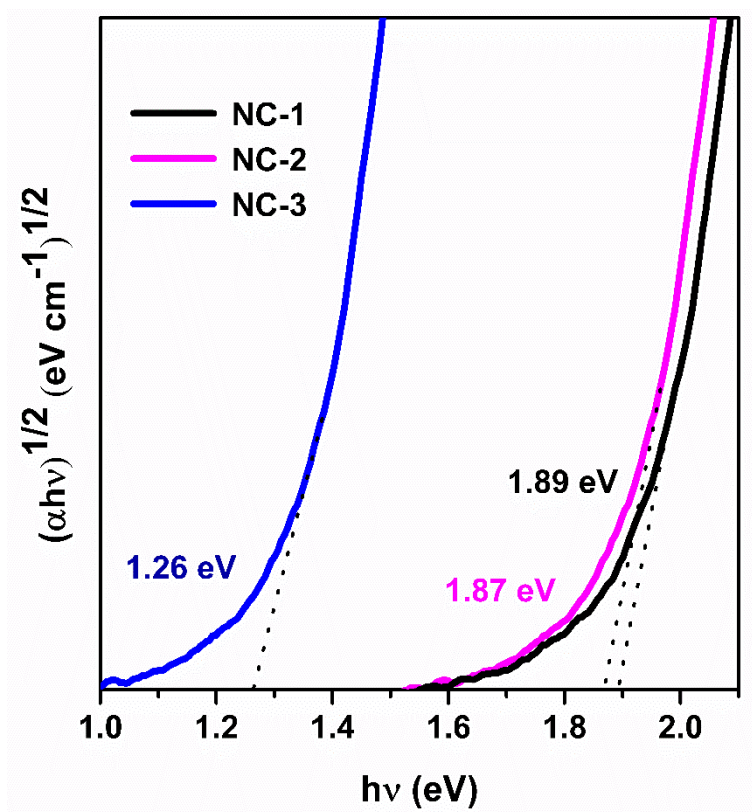

**Fig. S26** Solid-state bandgap of each NC.

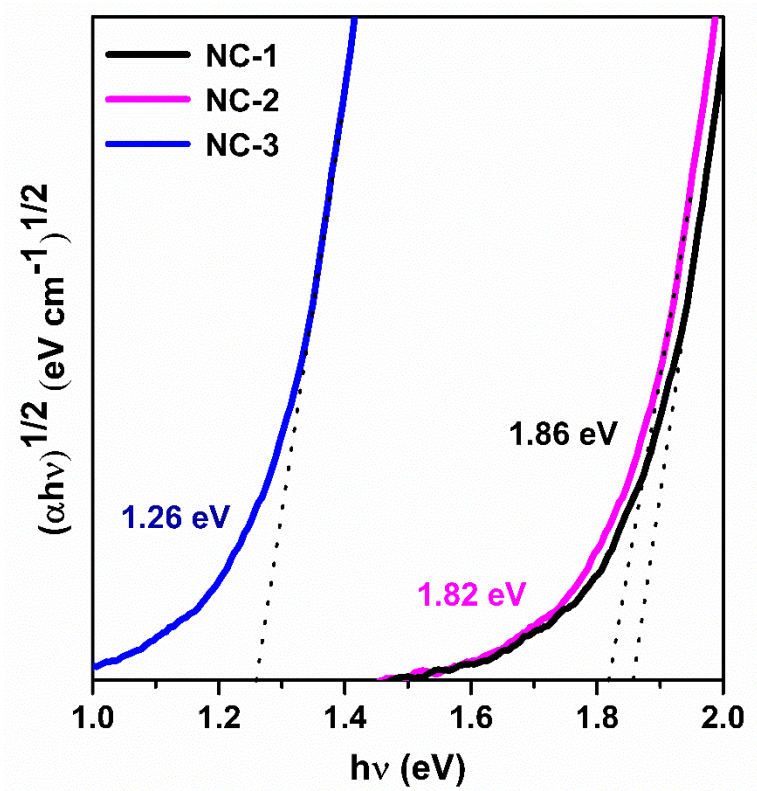

**Fig. S27** Solid-state bandgap of each NC after 1 months of synthesis.

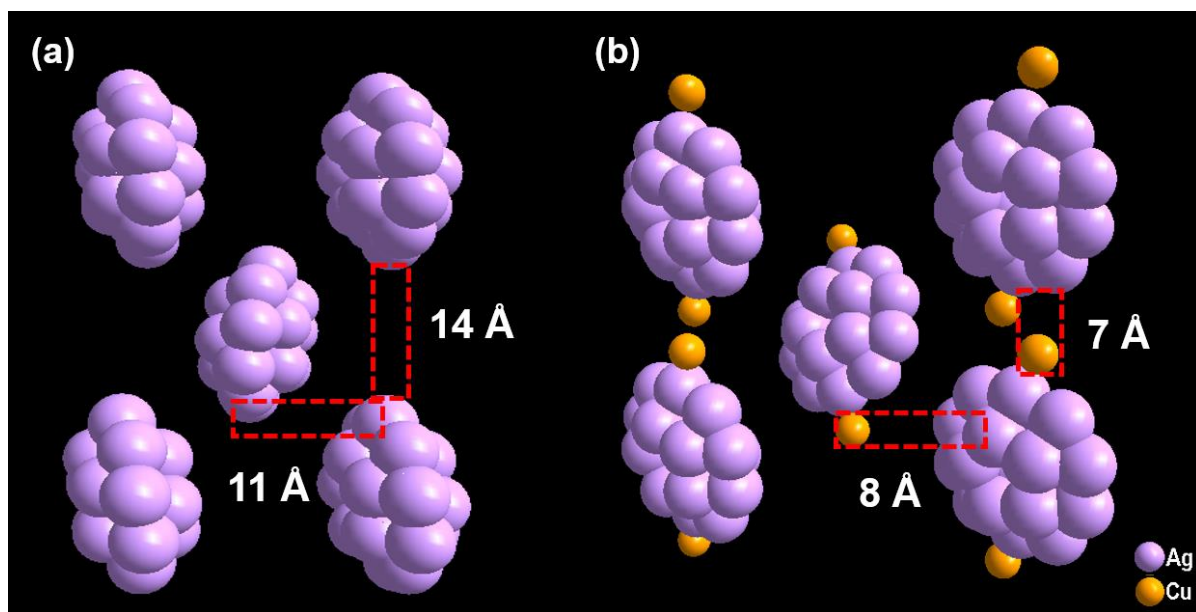

**Fig. S28** Edge-to-edge and face-to-face distances of (a) NC 1 and (b) NC 3.

## References

- S1. G. M. Sheldrick, *Acta Crystallogr. Sect. C: Struc. Chem.* 2015, **71**, 3-8.
- S2. G. M. Sheldrick, *Acta Crystallogr., Sect. A: Found. Adv.* 2015, **71**, 3-8.
- S3. L. J. Farrugia, *J. Appl. Crystallogr.* 2012, **45**, 849-854.
- S4. O. V. Dolomanov, L. J. Bourhis, R. J. Gildea, J. A. Howard, H. Puschmann, *J. Appl. Crystallogr.* 2009, **42**, 339-341.
- S5. M. J. Frisch, G. W. Trucks, H. B. Schlegel, G. E. Scuseria, M. A. Robb, R. J. Cheeseman, G. Scalmani, V. Barone, B. Mennucci, G. A. Petersson, H. Nakatsuji, et al. Gaussian 09, Revision D.01; Gaussian, Inc.: Wallingford, CT, 2009.
- S6. A. D. Becke, *J. Chem. Phys.* 1993, **98**, 5648-5652.
- S7. A. D. McLean, G. S. Chandler, *J. Chem. Phys.* 1980, **72**, 5639 –5648.
- S8. P. J. Hay, W. R. Wadt, *J. Chem. Phys.* 1985, **82**, 270 –283.
- S9. P. J. Hay, W. R. Wadt, *J. Chem. Phys.* 1985, **82**, 299 –310.
- S10. T. Lu, F. Chen, *J. Comput. Chem.* 2012, **33**, 580-592.
- S11. T. Lu, F. Chen, *Acta Chim. Sinica.* 2011, **69**, 2393-2406.
- S12. G. Kresse, J. Hafner, *Phys. Rev. B: Condens. Matter Mater. Phys.* 1994, **49**, 14251.
- S13. J. P. Perdew, J. A. Chevary, S. H. Vosko, K. A. Jackson, M. R. Pederson, D. J. Singh, C. Fiolhais, *Phys. Rev. B: Condens. Matter Mater. Phys.* 1992, **46**, 6671.
- S14. G. Kresse, D. Joubert, *Phys. Rev. B: Condens. Matter Mater. Phys.* 1999, **59**, 1758.
